# Supplementary material for: Inkjet-printed porous polyaniline gel as an efficient anode for microbial fuel cells
Source: Royal Society of Chemistry journal article supplement (doi:10.1039/c6ta05770e), 2016-01-01
Supplement: c6ta05770e1.pdf [file c6ta05770e1.pdf]

## Supporting Information (SI)

### **Inkjet-printed porous polyaniline gel as an efficient anode for microbial fuel cells**

Rong-Bin Song,<sup>ab</sup> Kun Yan,<sup>c</sup> Zong-Qiong Lin,<sup>b</sup> Joachim Say Chey Loo,<sup>bd</sup> Li-Jia Pan,<sup>c</sup> Qichun Zhang,<sup>\*be</sup> Jian-Rong Zhang<sup>\*af</sup> and Jun-Jie Zhu<sup>\*a</sup>

#### **Experiment section**

##### **Preparation of the inkjet-printed PANI/CP**

The inkjet-printed PANI/CP was fabricated using a dual-nozzle Liquidyn Inkjet Print System (Yefu Co. Ltd., Shanghai). Two precursor inks were first prepared. Ink A is dissolving 0.286 g (1.25 mM) ammonium persulfate in 1 mL DI water, while ink B was prepared by mixing 0.921 mL (1 mM) phytic acid (50%, wt/wt in water, Aldrich), 0.458 mL (5 mM) aniline (purified by distilling) and 2 mL DI water. After cooling to 4 °C, these two inks were successively inkjet printed onto the carbon paper (TGPH-120, Toray Co. Japan), and the pattern was gelled to form a homogeneous PANI hydrogel thin film on the surface of the carbon paper within 3 minutes. To remove excess acid and by-products, the inkjet-printed PANI/CP was purified by immersing in DI water for an hour. Finally, a freeze-drying method was used to dry it. **The content (C) of PANI printed on the carbon paper ( $0.5024 \pm 0.0092$  mg cm<sup>2</sup>) was calculated using  $C = (m_1 - m_0)/A$ , where  $m_1$  was the weight of carbon paper after printing,  $m_0$  the weight of carbon paper before printing, and S the area of carbon paper.**

##### **Preparation of carbon paper modified with phytic acid-doped PANI and HCl-doped PANI.**

**The phytic acid-doped PANI was prepared according to our previous report,<sup>1</sup> while the HCl-doped PANI was prepared by a commonly used chemical oxidative polymerization.<sup>2</sup> The obtained phytic acid-doped PANI was mixed with poly(tetrafluoroethylene) solution (1 wt%) to produce a paste. The paste was then coated on the surface of carbon paper (1.5 cm × 1.5 cm) to form a uniform film. The content of PANI coated on the carbon paper equaled to that of inkjet-printed PANI/CP (0.5 mg cm<sup>2</sup>). For carbon paper with HCl-doped PANI coating, the same procedure was used.**

##### **Characterization**

The morphologies of the inkjet-printed PANI/CP and carbon paper were characterized using a field emission SEM (JEOL/JSM-6340F). FT-IR measurement was performed on a Perkin Elmer Spectrum BX FT-IR spectrometer. EIS tests were carried out using a CHI604E electrochemical workstation (Chenhua, China) with a conventional three-electrode system in 2 mM K<sub>3</sub>Fe(CN)<sub>6</sub>/K<sub>4</sub>Fe(CN)<sub>6</sub> and 0.1 M KCl electrolyte. The inkjet-printed PANI/CP or carbon paper was used as the working electrode, while Pt wire and Ag/AgCl served as the counter and reference electrodes, respectively. All tests were conducted over a frequency range from 0.01 Hz to 100

KHz at open-circuit voltage with a perturbation signal of 5 mV.

### **Microbial culture**

*S. oneidensis* MR-1 was cultured in a tube containing 15 mL of Luria-Bertani (LB) broth (10 g L<sup>-1</sup> trypticase peptone, 5 g L<sup>-1</sup> yeast extract, and 10 g L<sup>-1</sup> sodium chloride) at 37 °C, with shaking at 150 rpm for 24 h. The cells were harvested by centrifugation (6000 rpm, 5 min) and re-dispersed in M9 buffer solution (22 mM KH<sub>2</sub>PO<sub>4</sub>, 42 mM Na<sub>2</sub>HPO<sub>4</sub>, 85.5 mM NaCl and 1.0 mM MgSO<sub>4</sub>) with 5% LB broth. All solutions were sterilized before use.

### **SEM analysis of microbial biofilm on electrode**

After 100 h incubation in MFC with bacteria culture, the electrodes were fixed by immersion in 2.5% glutaraldehyde solution for 1h and then dehydrated using a series of ethanol solution (25%, 50%, 75%, 95% and 100%). The samples were finally dried in air and coated with Au before the SEM characterization.

### **Phospholipids analysis for determining microbial biomass**

After MFCs operation for 100 h, electrodes with biofilm were removed from the anode chamber and analyzed according to the procedure reported previously.<sup>3</sup> The absorbance at 610 nm was determined using a spectrophotometer (3600 Shimadzu, Japan). The concentrations of phosphate were calculated using the regression line from a standard curve. The total active biomass of electrodes was obtained by using the conversion factor of 191.7 µg of biomass-C per 100 mmol of phospholipid.

### **MFC construction and operation**

H-shaped dual chamber MFCs separated by a proton exchange membrane (Nafion N117, Sigma-Aldrich, Singapore) were constructed in this study. After sterilization, 100 ml of M9 buffer solution containing bacterial culture was transferred to the anodic chamber, while the same volume of catholyte (50 mM K<sub>3</sub>Fe(CN)<sub>6</sub> and 0.1 M KCl) was added into the cathodic chamber. The anodes are inkjet-printed PANI/CP and carbon paper (1.5 cm × 1.5 cm), and the cathode is carbon felt. The anode and cathode were then connected to a 1 KΩ resistor.

With the addition of substrate (lactate, 18 mM) to the anodic chamber, the cell voltage measurements across the resistor were recorded once every 10 minutes by an eDAQ-order data acquisition system equipped with Chart software (Bronjo Medi, Singapore). When the MFC approached plateau, the polarization curves was obtained by switching resistors (50 Ω -100 KΩ). Power was calculated using  $P = IV$ , and current was calculated using  $I=V/R$ . The current and power outputs were normalized to the anode surface area, and the MFCs were operated at 30 °C.

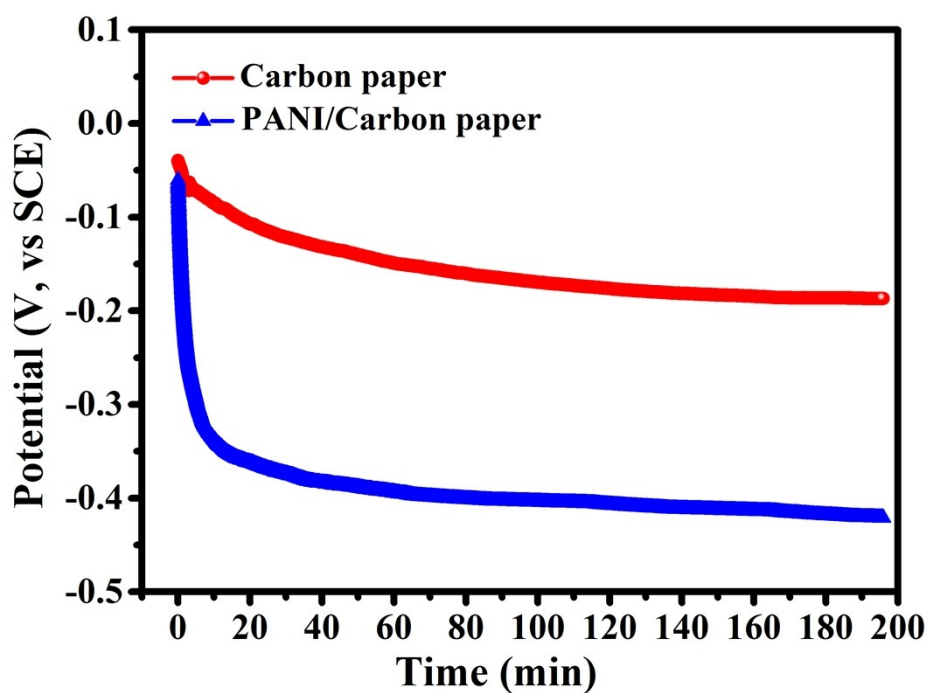

Fig. S1. Potential-time curve of different electrodes placed in a stirred anaerobic culture of *S. oneidensis* MR-1 in 25 ml of M9 buffer solution with 18 mM lactate.

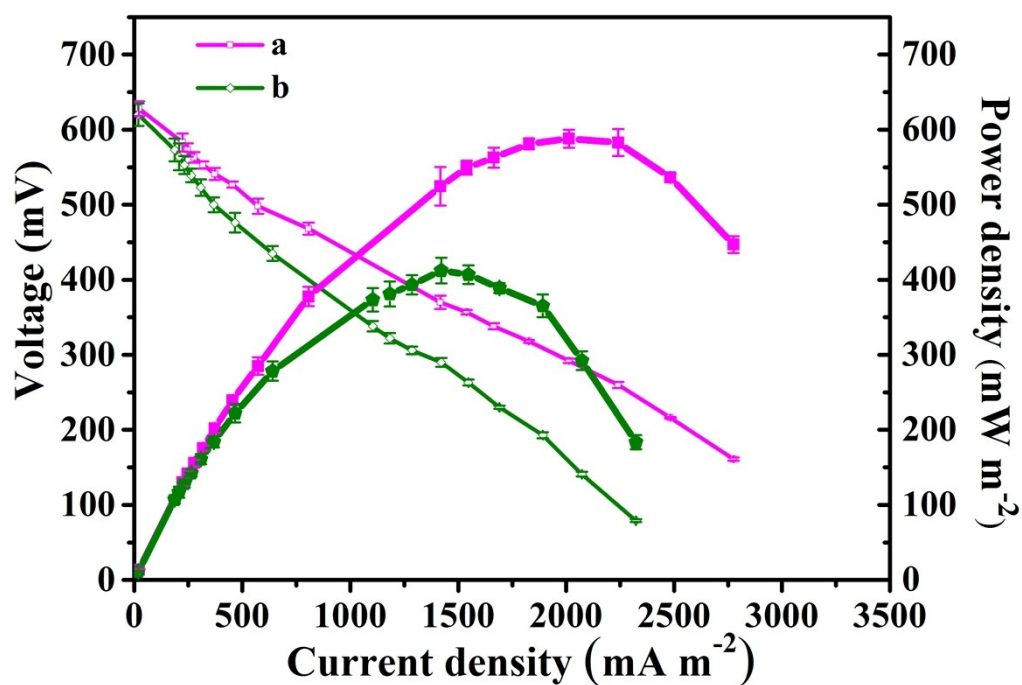

Fig. S2. Polarization curves and power density curves of MFCs equipped with different anodes: a) carbon paper modified with phytic acid-doped PANI and b) carbon paper modified with HCl-doped PANI.

Table S1. Comparison of the present result with literature data obtained using PANI based materials as anode electrode materials in MFCs.

| Electrode           | Anode material | Preparation method                       | Acid for PANI doping           | Microbe                             | power density (mW m <sup>-2</sup> ) | Reference         |
|---------------------|----------------|------------------------------------------|--------------------------------|-------------------------------------|-------------------------------------|-------------------|
| Carbon felt         | PANI           | chemical oxidative polymerization        | HCl                            | <i>Saccharomyces cerevisiae</i>     | 460                                 | 4                 |
| Nickel foams        | CNT/PANI       | chemical oxidative polymerization        | HCl                            | <i>Escherichia coli</i>             | 42                                  | 5                 |
| Graphite felt       | PANI           | electropolymerization                    | H <sub>2</sub> SO <sub>4</sub> | <i>Shewanella putrefaciens</i>      | 80                                  | 6                 |
| Graphite felt       | CNT/PANI       | electropolymerization                    | H <sub>2</sub> SO <sub>4</sub> | <i>Shewanella putrefaciens</i>      | 308                                 | 6                 |
| Graphite felt       | PANI           | electropolymerization                    | HCl                            | <i>Mixed bacteria</i>               | 134                                 | 7                 |
| Graphite felt       | PANI/GO        | electropolymerization                    | HCl                            | <i>Mixed bacteria</i>               | 183                                 | 7                 |
| Carbon cloth        | PANI           | chemical oxidative polymerization        | tartaric acid                  | <i>Shewanella oneidensis</i>        | 490                                 | 8                 |
| Nickel foam         | PANI           | chemical oxidative polymerization        | HCl                            | <i>Shewanella oneidensis</i>        | 70.8                                | 9                 |
| Carbon felt         | PANI           | chemical oxidative polymerization        | HCl                            | <i>Shewanella oneidensis</i>        | 145                                 | 9                 |
| Carbon cloth        | PANI           | chemical oxidative polymerization        | HCl                            | <i>Shewanella oneidensis</i>        | 323                                 | 9                 |
| <b>Carbon paper</b> | <b>PANI</b>    | <b>chemical oxidative polymerization</b> | <b>phytic acid</b>             | <b><i>Shewanella oneidensis</i></b> | <b>693</b>                          | <b>This study</b> |

## References

1. L. Pan, G. Yu, D. Zhai, H. R. Lee, W. Zhao, N. Liu, H. Wang, B. C.-K. Tee, Y. Shi, Y. Cui and Z. Bao, *Proc. Natl. Acad. of Sci. USA*, 2012, **109**, 9287-9292.
2. Y. Qiao, S.-J. Bao, C. M. Li, X.-Q. Cui, Z.-S. Lu and J. Guo, *ACS Nano*, 2008, **2**, 113-119.
3. L. Zhang, X. Zhu, J. Li, Q. Liao and D. Ye, *J. Power Sources*, 2011, **196**, 6029-6035.
4. D. Hidalgo, T. Tommasi, S. Bocchini, A. Chiolerio, A. Chiodoni, I. Mazzarino and B. Ruggeri, *Energy*, 2016, **99**, 193-201.
5. Y. Qiao, C. M. Li, S.-J. Bao and Q.-L. Bao, *J. Power Sources*, 2007, **170**, 79-84.
6. H.-F. Cui, L. Du, P.-B. Guo, B. Zhu and J. H. T. Luong, *J. Power Sources*, 2015, **283**, 46-53.
7. X. Jiang, S. Lou, D. Chen, J. Shen, W. Han, X. Sun, J. Li and L. Wang, *J. Electroanal. Chem.*, 2015, **744**, 95-100.
8. Z.-H. Liao, J.-Z. Sun, D.-Z. Sun, R.-W. Si and Y.-C. Yong, *Bioresour. Technol.*, 2015, **192**, 831-834.
9. Y.-C. Yong, X.-C. Dong, M. B. Chan-Park, H. Song and P. Chen, *ACS Nano*, 2012, **6**, 2394-2400.
